# Supplementary material for: Identification, Mapping and Eco-hydrological Signal Analysis for Groundwater-dependent Ecosystems (GDEs) in Langxi River Basin, North China
Source: Copernicus journal article supplement (doi:10.5194/hess-2023-151), 2023-09-19
Supplement: Supplementary file 1 [file hess-2023-151-supplement.pdf]

● **Supplementary Material**

**Identification, Mapping and Eco-hydrological Signal  
Analysis for Groundwater-dependent Ecosystems (GDEs) in  
Langxi River Basin, North China**

Mingyang Li, Fulin Li\*, Shidong Fu, Huawei Chen, Kairan Wang, Xuequn Chen,

Jiwen Huang

*(Water Resources Research Institute of Shandong Province, Shandong Provincial Key*

*Laboratory of Water Resources and Environment, Jinan 250013, China)*

**Supplementary Table 1.** Sensor parameters of various bands of Landsat series

satellites.

| <b>Bands</b> | <b>Blue</b> | <b>Green</b> | <b>Red</b> | <b>Nir</b> | <b>Swir1</b> | <b>Swir2</b> |
|--------------|-------------|--------------|------------|------------|--------------|--------------|
| Landsat5TM   | 0.0315      | 0.2021       | 0.3102     | 0.1594     | -0.6806      | -0.6109      |
| Landsat7ETM+ | 0.1509      | 0.1973       | 0.3279     | 0.3406     | -0.7112      | -0.4572      |
| Lansat8OLI   | 0.1511      | 0.1973       | 0.3283     | 0.34067    | -0.7117      | -0.4559      |

**Note:** Nir, Swir1 and Swir2 are the near red band, mid infrared band 1, mid infrared band 2.

**Supplementary Table 2.** Resources of the remote sensing datasets.

| <b>Dataset</b>                                           | <b>Resource</b>                                                                                                                                                                                                                                                                                                                                                                                                        | <b>Description</b>                                                                                                                                                                                                                                                                                                                                                                                                                                                                                                                                                     |
|----------------------------------------------------------|------------------------------------------------------------------------------------------------------------------------------------------------------------------------------------------------------------------------------------------------------------------------------------------------------------------------------------------------------------------------------------------------------------------------|------------------------------------------------------------------------------------------------------------------------------------------------------------------------------------------------------------------------------------------------------------------------------------------------------------------------------------------------------------------------------------------------------------------------------------------------------------------------------------------------------------------------------------------------------------------------|
| USGS<br>Landsat 8<br>Level 2,<br>Collection<br>2, Tier 1 | Cook M, Schott JR, Mandel J, Raqueno N.<br>Development of an Operational Calibration<br>Methodology for the Landsat Thermal Data<br>Archive and Initial Testing of the Atmospheric<br>Compensation Component of a Land Surface<br>Temperature (LST) Product from the Archive.<br><i>Remote Sensing</i> . 2014; 6(11):11244-11266.<br><a href="https://doi.org/10.3390/rs6111244">https://doi.org/10.3390/rs6111244</a> | This dataset contains<br>atmospherically corrected<br>surface reflectance and land<br>surface temperature derived<br>from the data produced by the<br>Landsat 8 OLI/TIRS sensors.<br>These images contain 5<br>visible and near-infrared<br>(VNIR) bands and 2 short-<br>wave infrared (SWIR) bands<br>processed to orthorectified<br>surface reflectance, and one<br>thermal infrared (TIR) band<br>processed to orthorectified<br>surface temperature. They<br>also contain intermediate<br>bands used in calculation of<br>the ST products, as well as<br>QA bands. |
| NASA<br>SRTM<br>Digital<br>Elevation<br>30m              | Farr, T. G., et al. (2007), The Shuttle Radar<br>Topography Mission, <i>Rev. Geophys.</i> , 45,<br>RG2004, doi:10.1029/2005RG000183.                                                                                                                                                                                                                                                                                   | The Shuttle Radar<br>Topography Mission (SRTM<br>digital elevation data is an<br>international research effort<br>that obtained digital elevation<br>models on a near-global scale.<br>This SRTM V3 product<br>(SRTM Plus) is provided by<br>NASA JPL at a resolution of 1<br>arc-second (approximately<br>30m). This dataset has<br>undergone a void-filling<br>process using open-source<br>data (ASTER GDEM2,<br>GMTED2010, and NED), as<br>opposed to other versions that<br>contain voids or have been<br>void-filled with commercial<br>sources.                 |

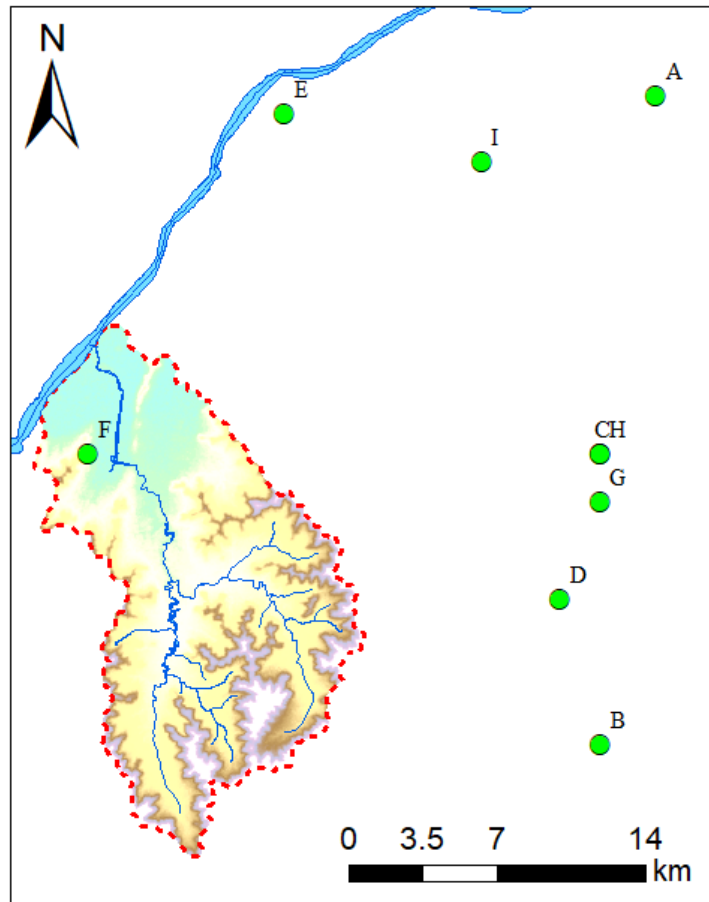

2021 Groundwater Level (m)

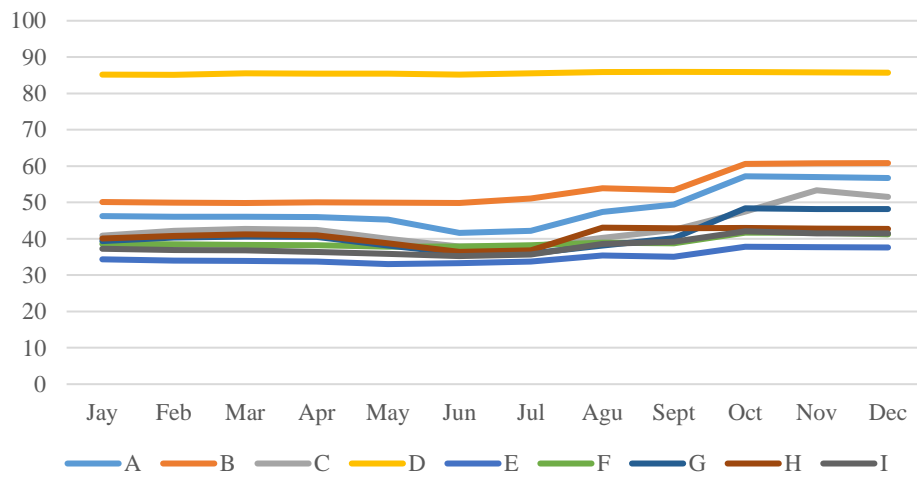

**Supplementary Figure 1.** Time series of the average groundwater level in or around Langxi River Basin in the research period.

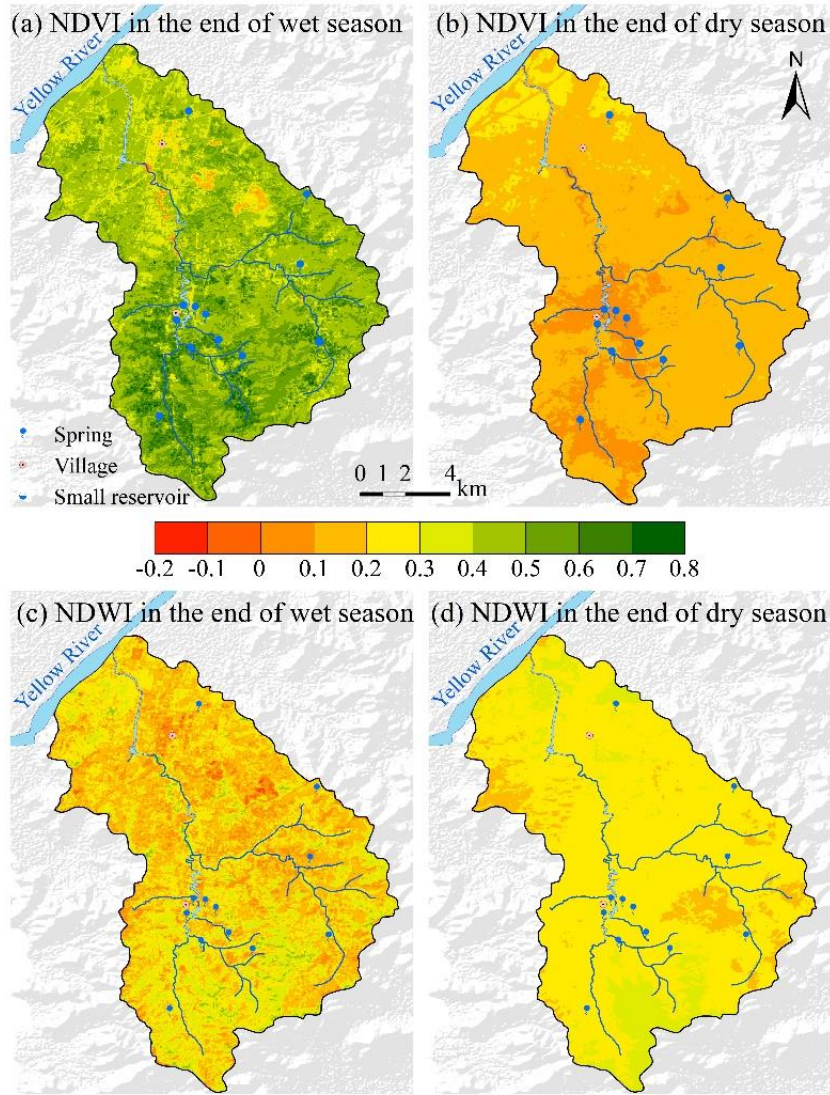

**Supplementary Figure 2.** NDVI (a, b) and NDWI (c, d) data for the end of the wet season (a, c) and the end of the dry season (b, d) (2020 to 2021).
